# Supplementary material for: Establishment of feeder-free culture system for human induced pluripotent stem cell on DAS nanocrystalline graphene
Source: PubMed Central journal article supplement (PMC4742916; doi:10.1038/srep20708), 2016-02-05
Supplement: srep20708-s1.pdf [file srep20708-s1.pdf]

## Supplementary Information

# Establishment of feeder-free culture system for human induced pluripotent stem cells on DAS nanocrystalline graphene

*Hyunah Lee, Donggyu Nam, Jae-Kyung Choi, Marcos J. Araúzo-Bravo, Soon-Yong Kwon, Holm Zaehres, Tahee Lee, Chan Young Park, Hyun-Wook Kang, Hans R. Schöler & Jeong Beom Kim*

## Contents

### Supporting Information Figures

|                                                                                     |    |
|-------------------------------------------------------------------------------------|----|
| Figure S1. Structural and optical properties of DAS/ITO or DAS/QU.....              | S1 |
| Figure S2. Morphology of hPSC on DAS/ITO, DAS/QU or MEF.....                        | S2 |
| Figure S3. Long-term maintenance of undifferentiated hiPSC on DAS/ITO or DAS/QU.... | S3 |
| Figure S4. Molecular characterization of hiPSC cultured on DAS/NG.....              | S4 |

### Supporting Information Tables

|                                                                                                                         |    |
|-------------------------------------------------------------------------------------------------------------------------|----|
| Table S1. Average colony size of hiPSC and hESC on DAS-NG at day 14.....                                                | S5 |
| Table S2. hPSC enriched cell adhesion gene expression of hiPSC or hESC grown on MEF, DAS/GL or bare GL.....             | S6 |
| Table S3. Three-germ layer enriched cell adhesion gene expression of hiPSC or hESC grown on MEF, DAS/GL or bare GL..... | S7 |
| Table S4. Quantitative real time PCR primers for cell-adhesion related genes.....                                       | S8 |
| Table S5. Primary antibody list.....                                                                                    | S9 |

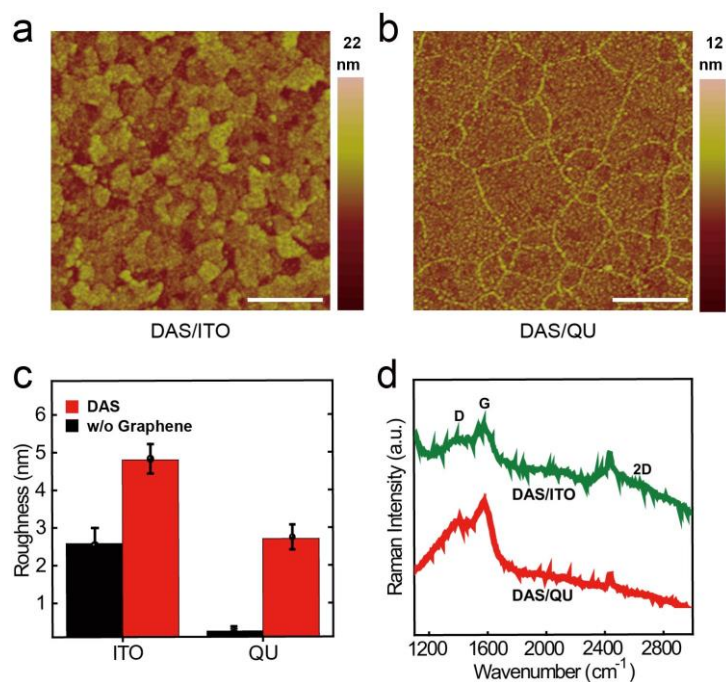

**Figure S1. Structural and optical properties of DAS-NG coated ITO or Quartz substrates.** (a,b) AFM images of the NG film coated by the DAS process at  $T = 260\text{ }^{\circ}\text{C}$  for 60 min on (a) ITO and (b) QU plates. Shown is the presence of high-density multilayer graphene ridges. (c) Plot of surface RMS roughness from AFM images ( $5 \times 5\text{ }\mu\text{m}^2$ ) of bare ITO, DAS/ITO and bare QU, DAS/QU. (d) Raman spectra of DAS/ITO (green) and DAS/QU (red). Scale bar, 1  $\mu\text{m}$  (a,b).

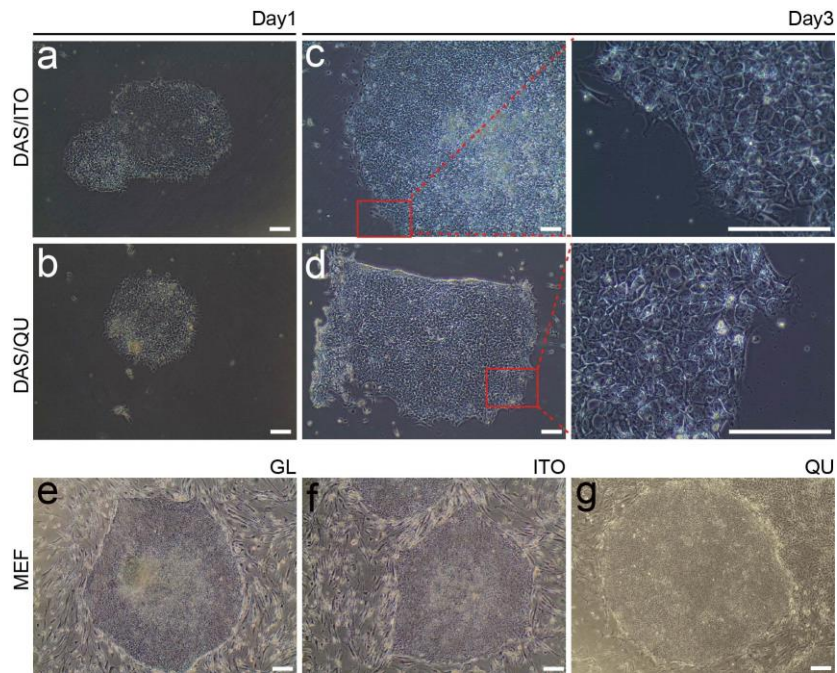

**Figure S2. Morphology of hPSC on DAS/ITO, DAS/QU or MEF.** (a,b) Morphology of hiPSC seeded on (a) DAS/ITO and (b) DAS/QU at day 1. (c,d) High magnification of hiPSC grown on (c) DAS/ITO and (d) DAS/QU at day 3. (e–g) Morphology of hiPSC co-cultured with MEF on (e) GL, (f) ITO and (g) QU at day 3. Scale bar, 200  $\mu\text{m}$  (a–g).

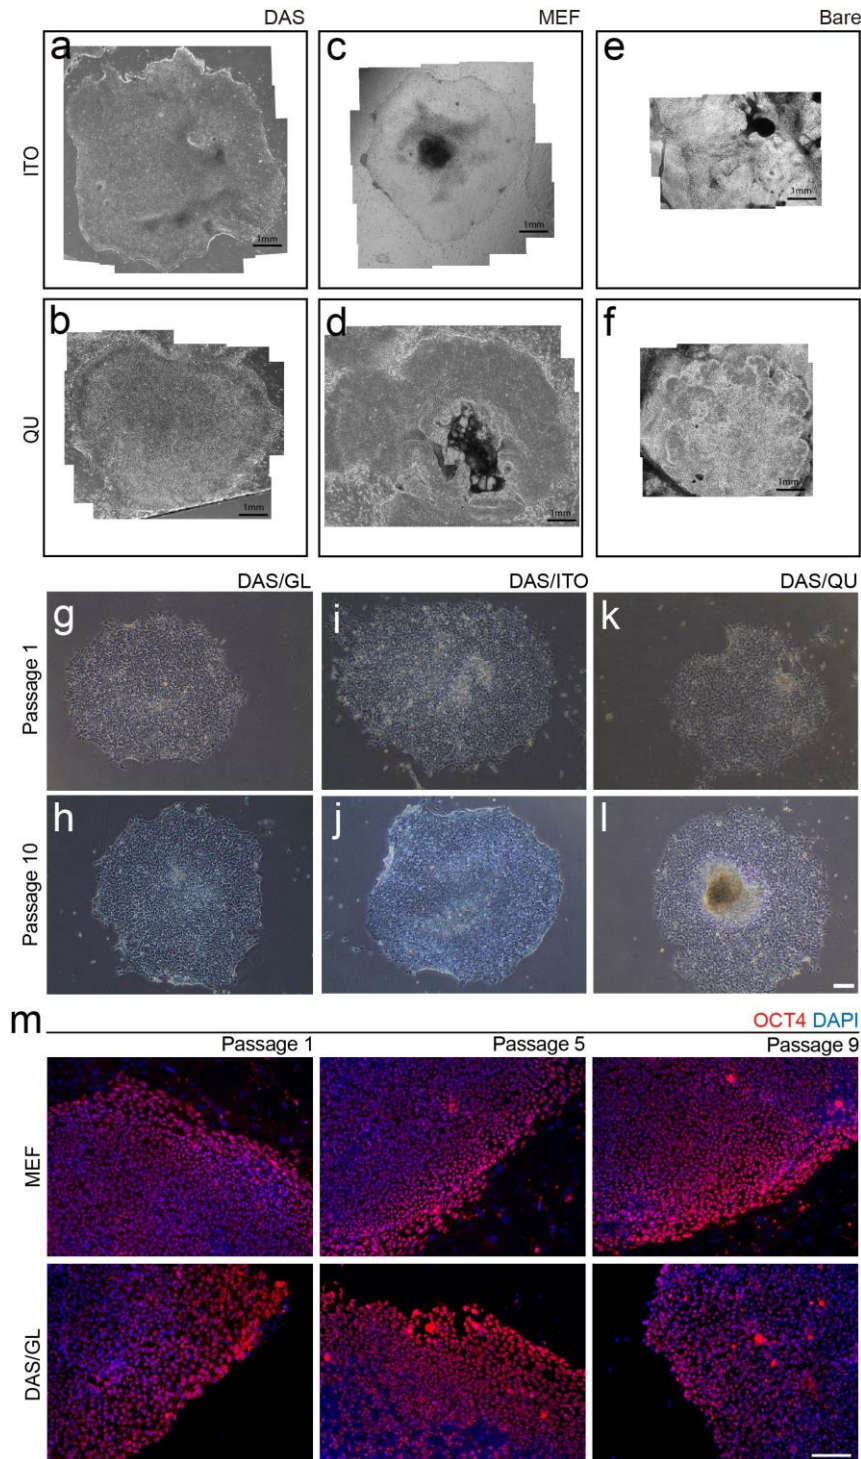

**Figure S3. Long-term maintenance of undifferentiated hiPSC on DAS/GL, DAS/ITO or DAS/QU.** (a-f) Morphology of hiPSC colony on (a) DAS/ITO and (b) DAS/QU or co-cultured with MEF on (c) ITO and (d) QU or on bare (e) ITO and (f) bare QU at 2 weeks of cultivation. (g-j) Morphology of hiPSC at passage 1 and passages 10 on (g,h) DAS/GL, (i,j) DAS/ITO and (k,l) DAS/QU. (m) Fluorescence images of OCT4<sup>+</sup> hiPSC cultured on MEF (top) or DAS/GL (bottom) at Passage 1 (P1), 5 (P5) and 9 (P9). Cells were counterstained with DAPI. Scale bar, 1  $\mu$ m (a-f), 200  $\mu$ m (g-l), Scale bar, 150  $\mu$ m (m).

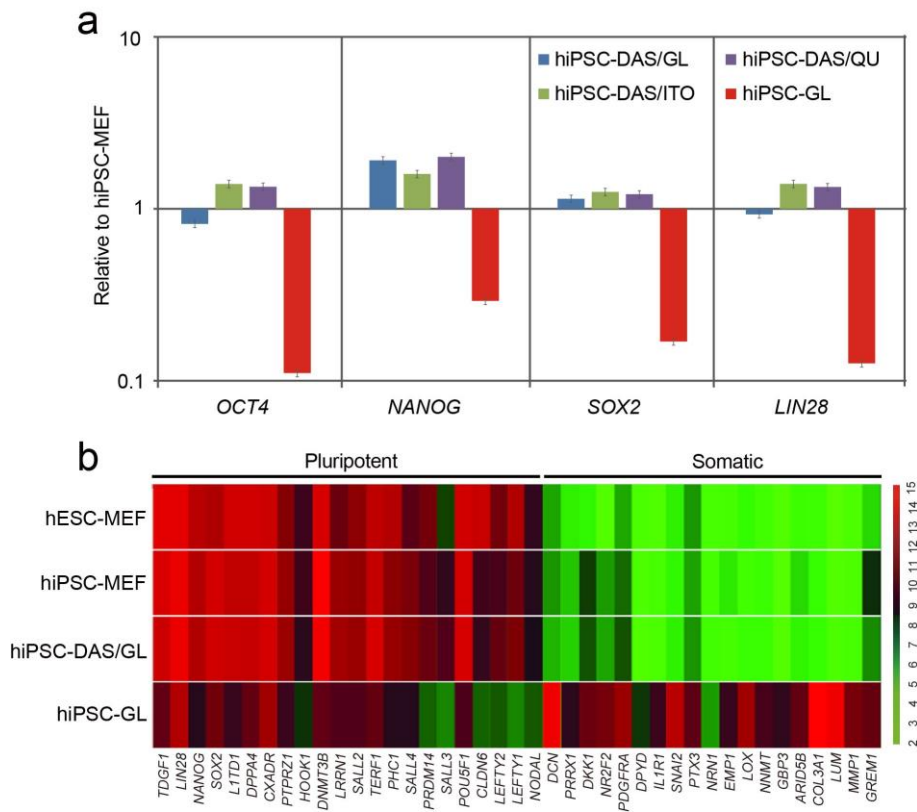

**Figure S4. Molecular characterization of hiPSC cultured on DAS/NG.** (a) Quantitative PCR (qRT-PCR) analysis for pluripotent markers (*OCT4*, *NANOG*, *SOX2* and *LIN28*) expression levels in hiPSC-DAS/GL, hiPSC-DAS/ITO, hiPSC-DAS/QU and hiPSC-GL relative to hiPSC-MEF. Transcript levels are normalized to *GAPDH* expression and represented in the logarithmic scale. Data are presented as mean  $\pm$  s.e.m (n=3). (b) A heatmap of microarray data showing gene expression of 22 pluripotent stem cell-enriched genes and 19 somatic cell-enriched genes within hESC-MEF, hiPSC-MEF, hiPSC-DAS/GL and hiPSC-GL. Color bar (right) indicates the color code gene expression in log<sub>2</sub> scale.

**Table S1.** Average colony size of hiPSC and hESC on DAS-NG at day 14.

|         | Average colony size (mm) |             |
|---------|--------------------------|-------------|
|         | hiPSC                    | hESC        |
| DAS/GL  | 5.45 ± 0.10              | 5.12 ± 0.18 |
|         | 4.87 ± 0.51              | 5.40 ± 0.11 |
| DAS/ITO | 4.52 ± 0.35              | 4.60 ± 0.41 |
|         | 4.33 ± 0.41              | 4.33 ± 0.41 |
| DAS/QU  | 4.36 ± 0.77              | 4.55 ± 0.59 |
|         | 4.29 ± 0.30              | 3.94 ± 0.11 |

Data are shown as mean ± s.e.m (n=3).

**Table S2.** hPSC enriched cell adhesion gene expression of hiPSC or hESC grown on MEF, DAS/GL or bare GL.

|               | hESC-<br>MEF | hiPSC-<br>MEF | hiPSC-<br>DAS/GL | hiPSC-<br>GL | Expression enriched<br>cell types |
|---------------|--------------|---------------|------------------|--------------|-----------------------------------|
| <i>CDH9</i>   | 7.0          | 6.7           | 7.1              | 4.0          | hPSC                              |
| <i>CELSR3</i> | 9.0          | 9.0           | 9.0              | 7.6          |                                   |
| <i>CLDN6</i>  | 9.8          | 9.7           | 9.5              | 7.3          |                                   |
| <i>CLDN10</i> | 9.9          | 9.5           | 9.3              | 7.4          |                                   |
| <i>MMP24</i>  | 7.5          | 8.3           | 8.1              | 6.1          |                                   |
| <i>RET</i>    | 8.1          | 8.0           | 8.3              | 5.3          |                                   |
| <i>CBLN1</i>  | 7.3          | 7.9           | 8.6              | 5.3          | hPSC and EB                       |
| <i>CELSR2</i> | 8.6          | 8.4           | 8.4              | 7.3          |                                   |
| <i>CDH4</i>   | 7.1          | 6.7           | 7.1              | 5.8          |                                   |
| <i>CDH6</i>   | 7.9          | 9.1           | 9.2              | 8.8          |                                   |
| <i>ITGB1</i>  | 5.2          | 5.6           | 6.0              | 4.0          |                                   |
| <i>ITGA6</i>  | 8.8          | 8.7           | 9.4              | 8.2          |                                   |
| <i>ITGA7</i>  | 7.1          | 6.6           | 6.6              | 5.3          |                                   |
| <i>LPHN1</i>  | 9.4          | 9.3           | 9.2              | 7.9          |                                   |
| <i>SORBS1</i> | 9.0          | 9.6           | 9.7              | 8.4          |                                   |
| <i>SRF</i>    | 9.1          | 9.0           | 9.1              | 8.2          |                                   |
| <i>TIAM1</i>  | 9.5          | 10.4          | 9.9              | 8.9          |                                   |
| <i>DDR1</i>   | 9.2          | 9.3           | 9.3              | 8.5          | hPSC and EB                       |
| <i>ITGA7</i>  | 9.2          | 9.0           | 8.8              | 7.4          | hPSC, EB and<br>endoderm          |

The expression values in a log<sub>2</sub> scale obtained from numerical data of Heat Map are shown on Figure. 4b.

**Table S3.** Three-germ layer enriched cell adhesion gene expression of hiPSC or hESC grown on MEF, DAS/GL or bare GL.

|                 | hESC-MEF | hiPSC-MEF | hiPSC-DAS/GL | hiPSC-GL | Expression enriched cell types |
|-----------------|----------|-----------|--------------|----------|--------------------------------|
| <i>COL13A1</i>  | 8.9      | 6.7       | 7.5          | 10.7     | Mesoderm lineage               |
| <i>FBLN5</i>    | 4.4      | 5.0       | 4.7          | 8.0      |                                |
| <i>PPFIBP2</i>  | 7.7      | 6.4       | 7.3          | 9.3      |                                |
| <i>AGT</i>      | 5.3      | 5.4       | 5.5          | 10.9     | Endoderm lineage               |
| <i>ANGPTL3</i>  | 4.1      | 4.0       | 4.5          | 8.0      |                                |
| <i>CEACAM1</i>  | 4.9      | 4.6       | 4.4          | 6.8      |                                |
| <i>CLDN1</i>    | 6.5      | 6.7       | 6.9          | 9.6      |                                |
| <i>CLDN15</i>   | 8.1      | 8.0       | 8.1          | 9.0      |                                |
| <i>ECM2</i>     | 3.9      | 4.1       | 4.2          | 8.1      |                                |
| <i>FGA</i>      | 2.8      | 2.8       | 3.2          | 13.2     |                                |
| <i>FGG</i>      | 4.6      | 4.9       | 4.8          | 14.0     |                                |
| <i>MPZL2</i>    | 4.8      | 4.2       | 4.0          | 8.4      |                                |
| <i>VTN</i>      | 5.3      | 5.5       | 5.6          | 10.9     |                                |
| <i>CDH19</i>    | 3.5      | 3.4       | 3.5          | 6.2      |                                |
| <i>LICAM</i>    | 7.6      | 8.3       | 8.0          | 9.7      |                                |
| <i>ATP2C1</i>   | 7.5      | 6.9       | 6.8          | 7.8      | Mesoderm and Ectoderm lineage  |
| <i>CD44</i>     | 7.3      | 7.0       | 6.4          | 9.5      |                                |
| <i>CDH13</i>    | 4.3      | 4.1       | 4.7          | 6.5      |                                |
| <i>ITGA4</i>    | 6.5      | 5.5       | 5.7          | 8.0      |                                |
| <i>ITGA11</i>   | 5.5      | 5.5       | 5.5          | 7.5      |                                |
| <i>ITGB1BP1</i> | 8.8      | 9.4       | 9.5          | 10.5     |                                |
| <i>PCDHGA1</i>  | 7.9      | 8.1       | 8.0          | 9.0      |                                |
| <i>PPFIBP1</i>  | 7.8      | 7.6       | 8.0          | 9.0      |                                |
| <i>CD164</i>    | 8.0      | 8.8       | 8.5          | 9.2      | All three germ layers          |
| <i>ITGA3</i>    | 6.4      | 6.0       | 5.9          | 7.2      |                                |
| <i>CDH5</i>     | 3.9      | 4.2       | 4.1          | 6.7      | EB                             |
| <i>CDH17</i>    | 5.0      | 5.1       | 5.0          | 6.8      |                                |
| <i>FREMI</i>    | 5.5      | 5.5       | 4.6          | 8.2      |                                |
| <i>NPNT</i>     | 4.2      | 4.5       | 3.9          | 12.3     |                                |
| <i>PCDHA1</i>   | 7.1      | 7.9       | 8.6          | 9.0      |                                |
| <i>PCDH17</i>   | 6.3      | 6.7       | 5.5          | 9.0      |                                |
| <i>ITGB6</i>    | 3.5      | 3.8       | 3.8          | 6.8      | EB and Endoderm lineage        |
| <i>VCAMI</i>    | 5.2      | 5.6       | 5.0          | 8.4      |                                |
| <i>CADM1</i>    | 8.3      | 8.8       | 7.8          | 10.0     | EB and Mesoderm lineage        |
| <i>COL3A1</i>   | 5.8      | 3.9       | 4.1          | 13.9     |                                |
| <i>ITGA8</i>    | 4.5      | 4.5       | 4.4          | 9.5      |                                |
| <i>NID2</i>     | 8.2      | 8.0       | 7.3          | 12.6     |                                |
| <i>CDH7</i>     | 5.1      | 4.8       | 5.1          | 6.3      | EB and All three germ layers   |
| <i>CLSTN2</i>   | 5.7      | 5.0       | 5.1          | 6.7      |                                |
| <i>EMP2</i>     | 8.6      | 8.6       | 8.8          | 9.7      |                                |
| <i>PCDHB14</i>  | 4.6      | 5.8       | 5.7          | 7.2      |                                |
| <i>PTPRM</i>    | 7.7      | 6.8       | 6.6          | 10.8     |                                |
| <i>ITGAV</i>    | 10.2     | 10.3      | 10.1         | 12.7     |                                |

The expression values in a log<sub>2</sub> scale obtained from numerical data of Heat Map are shown on Figure 4c.



**Table S4.** Quantitative real time PCR primers for cell-adhesion related genes.

| Gene           | Primer                                                                     | Accession number |
|----------------|----------------------------------------------------------------------------|------------------|
| <i>MEGF10</i>  | Forward: 5'-TGGTTTTTATGGGCATCGCT-3'<br>Reverse: 5'-TACAGGTTCCGTTGTTGGTG-3; | NM_032446.2      |
| <i>PCDH11X</i> | Forward: 5'-CAGCGGAAATCTGAAGGGAA-3'<br>Reverse: 5'-GGGTGTAGCACGATCAAAGT-3' | NM_032968.4      |
| <i>COL1A2</i>  | Forward: 5'-CAGAGTGGAGCAGTGGTTAC-3'<br>Reverse: 5'-CAGTTCTTGGCTGGGATGTT-3' | NM_000089.3      |
| <i>HAPLN1</i>  | Forward: 5'-CGGAGTCAGGAACTACGGAT-3'<br>Reverse: 5'-CATAGGTCAGTTTGGTGGGG-3' | NM_001884.3      |

**Table S5.** Primary antibody list.

| Antigen       | Source    | Isotype     | Dilution |
|---------------|-----------|-------------|----------|
| Oct3/4        | Santacruz | Goat IgG    | 1:200    |
| SSEA-4        | Millipore | Mouse IgG3  | 1:200    |
| TRA-1-60      | Millipore | Mouse IgM   | 1:200    |
| TRA-1-81      | Millipore | Mouse IgM   | 1:200    |
| TUJ1          | Millipore | Mouse IgG1  | 1:200    |
| $\alpha$ -SMA | Abcam     | Mouse IgG2a | 1:250    |
| AFP           | DAKO      | Rabbit IgG  | 1:200    |
